# Supplementary material for: Defining the Risk and Associated Morbidity and Mortality of Severe Respiratory Syncytial Virus Infection Among Infants with Chronic Lung Disease
Source: Springer Nature journal article supplement (doi:10.1007/s40121-016-0137-7), 2016-11-18
Supplement: MOESM1 [file 11062992]

Supplementary Information: Data Extraction Table

|   | Study Details                | Methodology |                                                |              |           | Population                                                    |                    |                                          |                     |        |                       | Outcomes relating to RSV                                                                                                                                                                                                                          | Conclusions                                                                                                                                                                 | Quality Scores |           |       |
|---|------------------------------|-------------|------------------------------------------------|--------------|-----------|---------------------------------------------------------------|--------------------|------------------------------------------|---------------------|--------|-----------------------|---------------------------------------------------------------------------------------------------------------------------------------------------------------------------------------------------------------------------------------------------|-----------------------------------------------------------------------------------------------------------------------------------------------------------------------------|----------------|-----------|-------|
|   | Citation                     | Country     | Study Design                                   | Intervention | Duration  | Inclusion criteria                                            | Exclusion criteria | Disease status                           | N                   | Gender | Mean age at admission |                                                                                                                                                                                                                                                   |                                                                                                                                                                             | Evidence Level | Item Bank | JADAD |
| 1 | Arnold et al. 1999.          | Canada      | Prospective, multi-centre analysis             | None         | 1993-1995 | NR                                                            | NR                 | Confirmed RSV infection                  | 159                 | NR     | NR                    | 159 infants of a cohort of 1516 had underlying respiratory issues. Of these, 91 patients had BPD prior to RSV infection. Patients using home oxygen were significantly more likely to be admitted to ICU during RSVH                              | RSV morbidity is similar in BPD and other respiratory conditions                                                                                                            | 3              | 10        | NA    |
| 2 | Berger et al. 2009.          | Switzerland | Prospective, multi-centre study                | None         | 2001-2005 | All children <3 years admitted to ICU for RSV-related illness | NR                 | Confirmed RSV infection                  | 462                 | NR     | 89% <12 months        | High risk infants (including those with BPD) were hospitalized at a later age, spent more time in hospital for RSV, and required more respiratory support                                                                                         | BPD was associated with a significant increase in relative risk for RSV ICU hospitalization                                                                                 | 1              | 11        | NA    |
| 3 | Berner et al. 2001.          | Germany     | Retrospective/prospective, single centre study | None         | 1988-1999 | Specimens taken from children hospitalized with RSV.          | None               | Confirmed RSV infection                  | 1064                | NR     | 47% <4 months         | Overall, RSVH in patients with BPD was 22%. 46/514 premature patients had CLD; of these, 52% had positive diagnosis of RSV. Six RSV patients died, of which 4 had CLD.                                                                            | Mortality is low, but disease burden is high, particularly in premature infants with CLD                                                                                    | 3              | 11        | NA    |
| 4 | Bonillo Perales et al. 2000. | Spain       | Prospective single centre study                | None         | 1997-2000 | All neonatal infants                                          | None               | Bronchiolitis admission                  | 12,895              | NR     | Mean 3.1 months       | 455 of 12,895 neonates (3.52%) were hospitalized for bronchiolitis. Hospitalization rate was 8.6% in preterm infants and 21.1% of preterm infants with neonatal mechanical ventilation. Prematurity also carried increased risk of ICU admission. | Neonatal mechanical ventilation, BPD and CHD are more closely linked to RSV positive bronchiolitis admission than gestational age.                                          | 1              | 10        | NA    |
| 5 | Boyce et al. 2000.           | USA         | Retrospective, multicentre study               | None         | 1989-1993 | Children <3 years old enrolled at birth in Tennessee Medicaid | NR                 | Confirmed RSV or bronchiolitis infection | 248,652 child-years | M: 51% | <3 years              | An overall rate of 81.6 RSVHs per 100 child years in infants <12 months old was reported. Infants with BPD, CHD, other conditions or preterm birth had a higher risk of RSV infection                                                             | Children <24 months with BPD have high rates of RSVH. After the first year of life, children with CHD or prematurity have similar rates to low risk infants <12 months old. | 3              | 11        | NA    |

|    |                                |             |                                    |               |           |                                                                                                       |                                                                                            |                                       |      |                                |                        |                                                                                                                                                                                                                                                      |                                                                                                                                                                                                                     |   |    |    |
|----|--------------------------------|-------------|------------------------------------|---------------|-----------|-------------------------------------------------------------------------------------------------------|--------------------------------------------------------------------------------------------|---------------------------------------|------|--------------------------------|------------------------|------------------------------------------------------------------------------------------------------------------------------------------------------------------------------------------------------------------------------------------------------|---------------------------------------------------------------------------------------------------------------------------------------------------------------------------------------------------------------------|---|----|----|
| 6  | Broughton et al. 2006.         | London      | Prospective, single centre study   | Lung function | NR        | Cohort of infants born <32 wGA born prior to RSV season onset                                         | NR                                                                                         | Confirmed RSV infection               | 39   | M:59%; RSV positive males: 66% | NR                     | 67% (10/15) of preterm infants hospitalized for RSV had BPD                                                                                                                                                                                          | Diminished lung function is likely to be a risk factor for RSV infection in preterm infants                                                                                                                         | 1 | 11 | NA |
| 7  | Carbonell-Estrany et al. 2000. | Spain       | Prospective multicentre study      | None          | 1998-1999 | Preterm infants ( $\leq 32$ wGA) born and discharged from hospital by March 31, 1999                  | Prophylaxis                                                                                | Confirmed RSVH                        | 584  | NR                             | NR                     | 118/584 infants were hospitalized for respiratory infection: 53 children had RSV positive infection. Logistic regression showed gestational age, presence of CLD, and having school-age siblings were all factors for RSVH.                          | The study enabled definition of the influence of specific risk factors that increase the risk of RSVH in preterm infants.                                                                                           | 1 | 11 | NA |
| 8  | Deshpande et al. 2003.         | UK          | Retrospective, multicentre study   | None          | 1996-1999 | All children <2 years of age resident within the health authority boundaries with a positive RSV test | Children born in the area that had moved away, and transient residents                     | Confirmed RSV infection               | 411  | M:F 1.5:1                      | Median 20.5 weeks      | RSV had a rate of 16.3/1000 children. hospitalization rates were higher in preterm infants born <36 weeks and aged <6 months at the start of the RSV season, and children with CLD.                                                                  | Preterm infants requiring ventilator assistance in the neonatal period, and those discharged on home oxygen therapy are at particular risk of RSVH. Serious adverse outcomes are rare even among high risk infants. | 3 | 11 | NA |
| 9  | Duppenthaler et al. 2001.      | Switzerland | Retrospective, single centre study | Prophylaxis   | 1998-2000 | Children <16 years hospitalised for RSV infection; resident in Canton of Berne                        | RSV not detected for 72 hours after hospitalization; RSV in absence of respiratory illness | Confirmed RSV infection               | 242  | M: 54.5%                       | 80.6% $\leq 12$ months | Overall, 3.7% of patients had CLD; however, all of these were born $\leq 35$ wGA (34.6% of total patients born $\leq 35$ wGA).                                                                                                                       | RSV course was mild in infants with CLD: median age was 9.3 months; median hospital LOS was 8 days; median duration of oxygen therapy was 4 days. No CLD patients died of RSV                                       | 1 | 11 | NA |
| 10 | Eriksson et al. 2002.          | Sweden      | Prospective, single centre study   | None          | 1987-1998 | All children hospitalized for RSV infection                                                           | NR                                                                                         | Virologically confirmed RSV infection | 1354 | M: 54%                         | Median 2.7 months      | RSV epidemics had a regular biannual pattern. Children with risk factors were older and had longer hospitalization. 76% of patients without risk factors had older siblings. Later hospitalization for wheezing was increased in children with RSVH. | The study found lower population rates of RSVH and complications than previously reported. The seasonal variation and the presence of siblings in the home influenced rates by factors of 2                         | 3 | 10 | NA |
| 11 | Flamant et al. 2005.           | Paris       | Retrospective, single centre study | Ventilation   | 1996-2003 | Ventilated children <1 year hospitalized to PICU for bronchiolitis                                    | Patients requiring chronic ventilation by tracheotomy                                      | Confirmed RSV infection               | 151  | M:F 1.9:1                      | 61.7 days              | 151 patients received ventilation for severe RSV infection. 9.3% received ECMO, of which BPD was a predictive factor. Diagnosis of BPD did not predict a worse outcome with ECMO                                                                     | BPD was associated with prolonged mechanical ventilation in RSVH.                                                                                                                                                   | 3 | 10 | NA |

|    |                         |        |                                    |             |           |                                                                           |      |                             |                 |                   |                        |                                                                                                                                                                                                                                                                                                                                                  |                                                                                                                                                                                                                                 |   |    |    |
|----|-------------------------|--------|------------------------------------|-------------|-----------|---------------------------------------------------------------------------|------|-----------------------------|-----------------|-------------------|------------------------|--------------------------------------------------------------------------------------------------------------------------------------------------------------------------------------------------------------------------------------------------------------------------------------------------------------------------------------------------|---------------------------------------------------------------------------------------------------------------------------------------------------------------------------------------------------------------------------------|---|----|----|
| 12 | Frogel et al. 2008.     | USA    | Prospective, multicentre study     | Prophylaxis | 2000-2004 | Cohort of children receiving ≥1 dose of palivizumab during the RSV season | None | Confirmed RSV infection     | 19,548 enrolled | NR                | NR                     | 38.6% of infants <32 wGA (3023/7826); 8.3% 32-35 wGA (777/9317); and 22.9% >35 wGA (549/2400) had CLD as a risk factor for RSVH. In prophylaxed infants, the overall RSV rate was 1.3%.                                                                                                                                                          | Prophylaxis is results in low RSV rates in high risk infants.                                                                                                                                                                   | 3 | 8  | NA |
| 13 | Gil-Prieto et al. 2015. | Spain  | Retrospective, multicentre study   | None        | 1997-2011 | All hospital discharges for bronchiolitis in children <5 years of age     | NR   | ICD codes for bronchiolitis | Total 326,175   | Total Male: 59.2% | Total mean: 5.8 months | Bronchiolitis was the primary cause of hospitalization in 85% of patients. 76% of admissions occurred between November and March. The highest hospitalization rate is shown in the first year of life with a rate of 4136/100,000 children <12 months, which decreases significantly with age. 1% of hospitalized infants had BPD (3114/315872). | The mean hospitalization for congenital cardiopathy, prematurity, and BPD were significantly higher than non-high-risk groups. Costs were also significantly higher in comorbid groups.                                         | 3 | 10 | NA |
| 14 | Greenough et al. 2001.  | UK     | Retrospective, single centre study | None        | 1994-1999 | All children ≤32 wGA with CLD followed to 2 years of age                  | NR   | Confirmed RSV infection     | 235             | NR                | NR                     | 45 infants (19%) had at least one hospital admission for a proven RSV infection within 2 years of birth. This group spent significantly longer in hospital than non-RSV admissions. The subsequent median admission rate per infant was significantly higher in the RSV group.                                                                   | Prematurely born CLD infants with RSVH have increased health service utilisation in the first two years after birth                                                                                                             | 3 | 11 | NA |
| 15 | Greenough et al. 2004.  | UK     | Retrospective, single centre study | None        | 1994-2002 | All children ≤32 wGA with CLD followed to 5 years of age                  | NR   | Confirmed RSV infection     | 190             | NR                | NR                     | 33/190 infants experienced RSV infection. At 2–4 years inclusive, the RSV group required more days in hospital and a greater number of outpatient attendances, both overall and for respiratory problems.                                                                                                                                        | In premature infants with CLD, RSVH in the first 2 years of life is associated with chronic morbidity and increased costs of care.                                                                                              | 3 | 11 | NA |
| 16 | Grimaldi et al. 2002.   | France | Retrospective, multicentre study   | None        | 1999-2000 | Infants hospitalized for RSV bronchiolitis                                | NR   | Confirmed RSV infection     | 484             | M: 59.6%          | 5 months               | 19.6% of infants with RSVH were born preterm (GA <37 weeks). 68.3% were aged <6 months at admission. Duration of hospitalization was a mean 7.3 days. 31 infants (6.4%) were admitted to PICU, 8 (1.7%) needed mechanical ventilation and 1 (0.2%) died.                                                                                         | At risk populations for severe RSV bronchiolitis with PICU admission should include all very preterm infants with respiratory distress syndrome. These epidemiological data could provide indications for RSV immunoprophylaxis | 1 | 8* | NA |

|    |                        |               |                                    |             |           |                                                                                                                                                     |                                                                                                                                                                           |                                                                       |                             |                                                |                     |                                                                                                                                                                                                                                                                                                                                   |                                                                                                                                  |   |    |    |
|----|------------------------|---------------|------------------------------------|-------------|-----------|-----------------------------------------------------------------------------------------------------------------------------------------------------|---------------------------------------------------------------------------------------------------------------------------------------------------------------------------|-----------------------------------------------------------------------|-----------------------------|------------------------------------------------|---------------------|-----------------------------------------------------------------------------------------------------------------------------------------------------------------------------------------------------------------------------------------------------------------------------------------------------------------------------------|----------------------------------------------------------------------------------------------------------------------------------|---|----|----|
| 17 | Grimaldi et al. 2004.  | France        | Prospective, multicentre study     | Prophylaxis | 1999-2002 | All children ≤32 wGA with BPD hospitalized for RSV infection                                                                                        | Criteria for hospitalization and transfer to PICU were not pre-defined and were the choice of each physician responsible for care.                                        | Confirmed RSV infection                                               | N per season: 123; 144; 154 | NR                                             | NR                  | The incidence of BPD in surviving preterm infants was 25%, 13.5 and 17.9% (by season). The RSVH rate in this population decreased significantly (46.2% vs. 11.8 and 3.8%; P<0.01), predominantly due to prophylaxis in later seasons.                                                                                             | The study supports the efficacy of prevention of RSV bronchiolitis by palivizumab in severely premature infants with BPD.        | 1 | 9  | NA |
| 18 | Groothuis et al. 2011. | USA           | Retrospective, multicentre study   | None        | 1998-2008 | Children <2 years with CLD                                                                                                                          | NR                                                                                                                                                                        | ICD codes for RSV                                                     | 10,622                      | Male RSV: 65%                                  | RSVH: 45% >6 months | RSVH in children <2 years with CLD steadily decreased over the 11-year study period, while all-cause hospitalization rates remained similar.                                                                                                                                                                                      | Decreased RSVH rates in this high risk population may be related to improved patient management or increased use of prophylaxis. | 2 | 10 | NA |
| 19 | Heikkinen et al. 2005. | Finland       | Retrospective, single centre study | None        | 1991-2000 | Birth cohort of all children born alive in a tertiary care university hospital                                                                      | Prophylaxis                                                                                                                                                               | Confirmed RSV infection                                               | 35,811                      | NR                                             | NR                  | 691 of analysed infants had CLD or were born at ≤ 32 wGA. RSV infection rate was 7.1% in infants born at ≤ 28 wGA and 6.8% in infants born at 29-32 wGA. Children born at ≤32 wGA or had CLD were responsible for 6.6% of all RSV admissions.                                                                                     | The rates of RSVH in preterm infants were substantially lower than reports from other countries.                                 | 3 | 11 | NA |
| 20 | Impact. 1998.          | Multinational | Prospective, multicentre study     | Prophylaxis | 1996-1997 | Cohort of children ≤35 wGA and ≤6 months of age ; or ≤24 months old or younger with a clinical diagnosis of BPD requiring ongoing medical treatment | Current long term hospitalization; mechanical ventilation at the time of entry; life expectancy less than 6 months; RSV infection; other comorbidities; other prophylaxis | Confirmed RSV infection                                               | 1,486                       | Male placebo: 56.8%<br>Male prophylaxis: 56.9% | NR                  | Prophylaxis resulted in significant reductions in RSVH in both premature infants (78% reduction) and premature infants with BPD (39% reduction).                                                                                                                                                                                  | RSV prophylaxis of preterm infants with CLD significantly decreases RSV infection rates                                          | 1 | 12 | 3  |
| 21 | Joffe et al.1999.      | USA           | Retrospective, multicentre study   | None        | 1992-1996 | Cohort of preterm infants ≤36 weeks neonatally discharged from NICU                                                                                 | Diagnosis of CHD; cystic fibrosis; immunodeficiency                                                                                                                       | ICD-9 codes for respiratory issues with secondary confirmation of RSV | 1,721                       | Male 55.7%                                     | NR                  | 3.2% of infants (55/1721) had RSVH. RSVH infants were more likely to be ≤ 32 wGA at birth; to have required ≥28 days supplemental oxygen in the NICU; to have had a lower birth weight; to have needed more mechanical ventilation in the NICU; and to have been initially discharged from the NICU between September - November. | Most preterm infants in this cohort were at lower risk of RSVH than previous studies in other populations have suggested.        | 3 | 11 | NA |
| 22 | Liese et al. 2003.     | Germany       | Prospective, multicentre study     | Prematurity | 1998-2000 | Infants with a GA of <35 weeks previously admitted to neonatal intensive care                                                                       | NR                                                                                                                                                                        | Confirmed or probable RSV infection                                   | 717                         | M: 52.3%                                       | NR                  | The risk of subsequent RSV infection in preterm infants released from NICU was 5.2%. This increased to 15% in preterm infants with CLD. Independent risk factors for RSV were male gender, CLD, discharge between October-December, sibling day                                                                                   | Risk of rehospitalization for RSV in preterm infants in Germany is low.                                                          | 3 | 11 | NA |

|    |                          |         |                                  |             |           |                                                                                                                                                   |                           |                               |                                                               |                           |                       |                                                                                                                                                                                                                                                                                                                                                    |                                                                                                                                                              |   |    |    |
|----|--------------------------|---------|----------------------------------|-------------|-----------|---------------------------------------------------------------------------------------------------------------------------------------------------|---------------------------|-------------------------------|---------------------------------------------------------------|---------------------------|-----------------------|----------------------------------------------------------------------------------------------------------------------------------------------------------------------------------------------------------------------------------------------------------------------------------------------------------------------------------------------------|--------------------------------------------------------------------------------------------------------------------------------------------------------------|---|----|----|
|    |                          |         |                                  |             |           |                                                                                                                                                   |                           |                               |                                                               |                           |                       | care attendance.                                                                                                                                                                                                                                                                                                                                   |                                                                                                                                                              |   |    |    |
| 23 | Medici et al. 2006.      | Italy   | Prospective, multicentre study   | Seasonality | 2000-2004 | Children ≤4 years referred to the ED for suspected LRTI                                                                                           | NR                        | Confirmed RSV infection       | Total 2110                                                    | Total Male 55%            | Total mean: 17 months | 433/2110 (20.5%) of bronchiolitis admissions tested positive for RSV. 8% of 2110 infants hospitalized for bronchiolitis had CLD                                                                                                                                                                                                                    | A significant impact of CLD was recorded, but distribution of 'high risk' factors did not differ across study years.                                         | 1 | 10 | NA |
| 24 | Murray et al. 2014.      | UK      | Prospective, multicentre study   | None        | 2007-2008 | Birth cohort of all children born across 71 English hospitals                                                                                     | NR                        | ICD codes for RSV             | 7189 bronchiolitis admissions                                 | NR                        | NR                    | 28.0% (2015/7189) of bronchiolitis admissions were coded as RSV. 282 bronchiolitis admissions (5.6%) were in infants with CLD, equal to a rate of 56.2 per 100 infants <1 year                                                                                                                                                                     | Clinical subgroups are at increased risk of hospital admission, but most bronchiolitis cases in England are in otherwise healthy, term infants               | 3 | 11 | NA |
| 25 | Pedersen et al. 2003.    | Denmark | Retrospective, multicentre study | None        | 1994-1995 | Infants born <28 wGA or <1000 g birth weight who were discharged alive and hospitalized during the first 2 years of life.                         | NR                        | Confirmed RSV infection       | 240                                                           | RSV positive males: 53.5% | 10.5 months           | 18% (43) of infants analysed were RSV-positive. 16% of infants without CLD and 30% of infants with CLD were RSV positive. 38% of RSV positive infants required ventilator support. Mean RSVH LOS was 10.8 days                                                                                                                                     | The rehospitalization rate in very preterm infants, particularly in infants with CLD, should be used to inform prophylaxis practices.                        | 3 | 10 | NA |
| 26 | Pérez Pérez et al. 2004. | Spain   | Prospective, single centre study | Prematurity | 1996-2001 | Cohort of preterm infants (32 wGA) follows for the first 2 years of life                                                                          | NR                        | Confirmed RSV infection       | Preterm BPD: 29<br>Preterm no BPD: 29<br>Matched controls: 32 | NR                        | NR                    | At least one episode of wheezing occurred in 25 (86.2 %) preterm BPD infants vs. 12 preterm non-BPD children (41.4 %) and 6 (18.8 %) controls.                                                                                                                                                                                                     | During the first 2 years of life, children with BPD showed a greater number of admissions and episodes of wheezing and a greater need for medical treatment. | 2 | 10 | NA |
| 27 | Pezzotti et al. 2009.    | Italy   | Retrospective, multicentre study | None        | 2000-2006 | Cohort of preterm infants (<36 wGA) born in the study catchment area, limited to bronchiolitis hospitalization within the first 18 months of life | Death; incomplete records | ICD-9 codes for bronchiolitis | 2,407                                                         | Bronchio. males: 62%      | 64% < 6 months        | 137/2407 preterm infants were hospitalized with bronchiolitis during the study period, equal to an incidence rate of 4.70/100 person-years. Bronchiolitis incidence was higher <6 months of age, and then decreased with age. The following risk factors were identified: male gender; low birth weight (p < 0.01), <32 wGA; Apgar score ≤ 7; BPD. | The incidence rate and risk factors reported here are similar to that reported in other countries.                                                           | 2 | 11 | NA |

|    |                       |             |                                  |              |                        |                                                                         |                                                                                                                                                             |                                       |                                |                                              |                                                |                                                                                                                                                                                                                                                                                                                                                                                                              |                                                                                                                         |   |    |    |
|----|-----------------------|-------------|----------------------------------|--------------|------------------------|-------------------------------------------------------------------------|-------------------------------------------------------------------------------------------------------------------------------------------------------------|---------------------------------------|--------------------------------|----------------------------------------------|------------------------------------------------|--------------------------------------------------------------------------------------------------------------------------------------------------------------------------------------------------------------------------------------------------------------------------------------------------------------------------------------------------------------------------------------------------------------|-------------------------------------------------------------------------------------------------------------------------|---|----|----|
| 28 | Ricart et al. 2012.   | Spain       | Prospective, single centre study | None         | 2007-2008              | Infants <12 months admitted to the pediatrics ward or PICU              | Underlying chronic pulmonary disease other than BPD; recurrent wheezing; apnea secondary to a known disease; respiratory symptoms due to bronchoaspiration. | Confirmed RSV infection               | Total 410                      | Total Male: 57.8%                            | Median 1.9 months                              | Of 410 infants hospitalized for bronchiolitis, 10 had BPD. 287/410 infants had virally confirmed RSV. Multivariate logistic regression indicated that BPD was the strongest predictor of severe bronchiolitis                                                                                                                                                                                                | Clinical risk factors have specific weight in predicting bronchiolitis outcome                                          | 1 | 11 | NA |
| 29 | Rietveld et al. 2004. | Netherlands | Prospective, multicentre study   | Costs of RSV | 1996-1997<br>1999-2000 | Infants <1 year (<2 years with BPD) hospitalized for severe RSV disease | NR                                                                                                                                                          | Confirmed RSV infection               | 3,458                          | Male 58.7%                                   | 50.2% < 3 months                               | Of 3548 infants with RSVH, those with prematurity or BPD were significantly more likely to require ICU admission and to receive increased LOS. In all patients, mean hospitalization LOS and the accompanying RSVH costs increased with lower GA (€5555; GA ≤28 weeks), lower birth weight (€3895; birth weight ≤2500 g), BPD (€5785; with BPD) and young age (€4730; first month of life).                  | RSVH costs are substantial, particularly in high risk groups.                                                           | 3 | 10 | NA |
| 30 | Rossi et al. 2005.    | Italy       | Prospective, multicentre study   | None         | 2000-2002              | Children ≤4 years referred to the ED for suspected LRTI                 | NR                                                                                                                                                          | Virologically confirmed RSV infection | Season 1: 272<br>Season 2: 756 | Male Season 1: 51.8%<br>Male Season 2: 54.8% | Season 1: 15.7 months<br>Season 2: 18.7 months | Of the infants hospitalized for possible RSV infection, 16.5% in season 1 and 7.9% in season 2 had CLD.                                                                                                                                                                                                                                                                                                      | Patient characteristics were shown to vary between seasons, but indicated that RSV remains a serious issue in children. | 1 | 10 | NA |
| 31 | Simon et al. 2008.    | Germany     | Prospective, multicentre study   | None         | 1999-2005              | Children hospitalized with RSV infection                                | NR                                                                                                                                                          | Virologically confirmed RSV infection | 1,568                          | M: 56.7-58.3%                                | Median 113-160 days                            | Of the confirmed RSV cases, 6% were nosocomial and 94% were community acquired. A significantly higher proportion in the nosocomial group had additional risk factors e.g. prematurity, CLD, history of mechanical ventilation, CHD, and neuromuscular impairment. 55% of nosocomial infections occurred in preterms. Illness severity and total mortality was significantly higher in the nosocomial group. | This study confirms the increased risk of a severe clinical course in nosocomially acquired RSV infection.              | 1 | 11 | NA |
| 32 | Simon et al. 2007.    | Germany     | Prospective, multicentre study   | None         | 1999-2005              | Preterm infants (<37 wGA) hospitalized with RSV infection               | NR                                                                                                                                                          | Virologically confirmed RSV infection | 406                            | M: 56.4%                                     | Median 142 days                                | 12.3% (50/406) of preterm infants with RSV had CLD, of which 49 had received treatment within the previous 6 months.                                                                                                                                                                                                                                                                                         | CLD requiring treatment in preterm infants is an independent risk factor for a more complicated disease course.         | 1 | 10 | NA |

|    |                           |        |                                        |                 |           |                                                                                             |                                                                    |                         |      |                   |                          |                                                                                                                                                                                                                                                                                                                                                                                                                                                                                                                                                          |                                                                                                                                                                                                                                     |   |    |    |
|----|---------------------------|--------|----------------------------------------|-----------------|-----------|---------------------------------------------------------------------------------------------|--------------------------------------------------------------------|-------------------------|------|-------------------|--------------------------|----------------------------------------------------------------------------------------------------------------------------------------------------------------------------------------------------------------------------------------------------------------------------------------------------------------------------------------------------------------------------------------------------------------------------------------------------------------------------------------------------------------------------------------------------------|-------------------------------------------------------------------------------------------------------------------------------------------------------------------------------------------------------------------------------------|---|----|----|
| 33 | Tatochenko et al. 2010.   | Russia | Prospective, multicentre study         | None            | 2008-2009 | Children ≤2 years hospitalized for LRTI                                                     | Prophylaxis; enrollment in RSV clinical trial within last 100 days | Confirmed RSV infection | 519  | Male RSV:61%      | RSV positive: 7.5 months | 38.0% (197/519) children enrolled were RSV positive. The RSV season began in late October and peaked in early April. More high-risk RSV-positive children (i.e. children with CHD, CLD/BPD) required oxygen supplementation than non-high risk children (28% v 10%). No mechanical ventilation, CPAP, or surgeries were required. There were no deaths.                                                                                                                                                                                                  | The pattern in the Russian Federation is similar to that identified in other temperate zones in the northern hemisphere.                                                                                                            | 1 | 10 | NA |
| 34 | Thomas et al. 2000.       | UK     | Retrospective, single centre study     | Preterm infants | 1995      | Neonates <32 wGA admitted for medical neonatal intensive care within the first week of life | Incomplete data                                                    | Confirmed RSV infection | 82   | NR                | NR                       | 34/82 preterm infants studied had a diagnosis of CLD. 3/34 were admitted with confirmed RSV. LOS and PICU admission were substantially higher in CLD infants on home oxygen vs non CLD preterms (20 days PICU vs 0 days, respectively).                                                                                                                                                                                                                                                                                                                  | RSV prophylaxis of infants with CLD on home oxygen would be relatively cost effective compared with other infants                                                                                                                   | 2 | 10 | NA |
| 35 | Thorburn. 2009.           | UK     | Prospective/retrospective cohort study | Mortality       | 1999-2007 | Children hospitalised to the PICU with RSV bronchiolitis                                    | NR                                                                 | Confirmed RSV infection | 2009 | NR                | NR                       | 98.5% of 406 RSV-positive patients admitted to PICU required mechanical ventilation; 35 children died. The overall PICU RSV mortality was 8.6% with a standardised mortality ratio of 0.76. The hospital RSV mortality rate was 1.7%. 18 deaths were directly RSV-related (PICU 4.4%; hospital 0.9%). 17 died from non-pneumonitis causes after becoming RSV negative. All RSV deaths had pre-existing medical conditions. Risk factors for death were pre-existing disease (RR 2.36), cardiac anomaly (RR 2.98) and nosocomial RSV infection (RR 2.89). | Pre-existing disease / co-morbidity is associated with a significantly higher risk of death from severe RSV infection. Nosocomial RSV infection is an additional major risk factor for death in children with severe RSV infection. | 3 | 8  | NA |
| 36 | Van de Steen et al. 2016. | Europe | Retrospective, multicentre study       | None            | 2009-2011 | Cohort of infants <1 year hospitalized for LRTI                                             | Duplicate records                                                  | Confirmed RSV infection | 3474 | Total Male: 58.3% | Total: 69.1% <6 months   | Rapid RSV test was performed in 3354 (96.5%) cases and were positive in 1423 infants (42.4%). Of the RSV-positive, 18.7% were preterm and 72.7% were otherwise healthy term children. Preterm infants had significantly longer hospitalizations than term children, and required more frequent ICU and oxygen support.                                                                                                                                                                                                                                   | RSV is the cause of a substantial burden in European children; preterm birth is a notable risk factor for RSVH                                                                                                                      | 2 | 11 | NA |

|    |                    |         |                                    |              |           |                                                                                                                                                              |                                     |                                   |       |    |                                |                                                                                                                                                                                                                                                                                                                                                                                                                                                                        |                                                                                                                                                                                                                 |   |    |    |
|----|--------------------|---------|------------------------------------|--------------|-----------|--------------------------------------------------------------------------------------------------------------------------------------------------------------|-------------------------------------|-----------------------------------|-------|----|--------------------------------|------------------------------------------------------------------------------------------------------------------------------------------------------------------------------------------------------------------------------------------------------------------------------------------------------------------------------------------------------------------------------------------------------------------------------------------------------------------------|-----------------------------------------------------------------------------------------------------------------------------------------------------------------------------------------------------------------|---|----|----|
| 37 | Wang et al. 1995.  | Canada  | Prospective, multicentre study     | None         | 1993      | Children <2 years hospitalised for RSV LRTI; any children hospitalised for RSV LRTI with underlying cardiac disease, pulmonary disease, or immunosuppression | Patients >2 years with only asthma  | Confirmed RSV infection           | 689   | NR | 9.1 months (median 4.9 months) | The mean RSVH LOS was 7 days; 110 patients were admitted to ICU, 63 were supported by mechanical ventilation, and 6 died. In addition to previously described risk factors for increased morbidity, aboriginal race (defined by maternal race), a history of apnea or respiratory arrest during the acute illness before hospitalisation, and pulmonary consolidation as shown on the chest radiograph obtained at admission were identified as relevant risk factors. | Patients with underlying diseases and, possibly, those of aboriginal race should be targeted for RSV vaccine trials                                                                                             | 1 | 11 | NA |
| 38 | Weigl et al. 2001. | Germany | Retrospective, multicentre study   | None         | 1996-1999 | Children <16 hospitalised for ARTI                                                                                                                           | NR                                  | Confirmed RSV infection           | 1,241 | NR | 74% <1 year                    | 150/1,241 (12.1%) of patients tested positive for RSV. 25% of infected children also had an underlying condition. The cumulative incidence rate was higher in premature infants (1,214/100,000 in infants <32 wGA). Birth at <32 wGA and BPD increased RR to 17.8.                                                                                                                                                                                                     | Throughout Germany, approximately 10,000 RSV-related hospitalisations in infants can be expected annually. Prematurity is an effect modifier and BPD a strong risk factor for RSVH in population-based studies. | 3 | 11 | NA |
| 39 | Zaw et al. 2003.   | UK      | Retrospective, single centre study | Costs of RSV | 1995-1999 | Children <2 years of age hospitalised in the Highlands                                                                                                       | Children outside region of interest | ICD codes for acute bronchiolitis | 507   | NR | NR                             | 18/507 children hospitalized for bronchiolitis were preterm at birth (<35 wGA). Four preterm infants had BPD. Their respiratory score at the time of bronchiolitis admission was similar to patients without BPD but median hospitalization LOS was longer (10.5 vs 2.5 days). All BPD infants required supplemental oxygen vs. 28.6% (4/14) non BPD patients. Median duration of oxygen requirement for BPD infants was 7 vs. 2 days for non BPD infants.             | The costs of hospital admission of preterm infants (especially <30 wGA) and infants with BPD were high.                                                                                                         | 2 | 11 | NA |

RSV: respiratory syncytial virus; RSVH: RSVH hospitalization; LRTI: lower respiratory tract infection; ICU: intensive care unit; NICU: Neonatal ICU; PICU: pediatric ICU; LOS: length of stay; CHD: congenital heart disease; CLD: chronic lung disease; BPD: bronchopulmonary dysplasia; GA: gestational age; wGA: weeks gestational age; ED: emergency department; ECMO: extracorporeal membrane oxygenation.
